# Supplementary material for: Clinical and laboratory characteristics and follow up of 62 cases of ketotic hypoglycemia: a retrospective study
Source: Int J Pediatr Endocrinol. 2019 Nov 2;2019:3. doi: 10.1186/s13633-019-0066-9 (PMC6825346; doi:10.1186/s13633-019-0066-9)
Supplement: Supplementary file 1 — Additional file 1. Chart reviews including demographic, clinical, and laboratory data and follow-up of patients with ketotic hypoglycemia. [file 13633_2019_66_MOESM1_ESM.xlsx]

## Sheet: Sheet1
Date of consult	Provider	ER vs inpatient	Age decimal	Sex (M=1, F=2)	Symptoms	Prev Hx?	Time of Day	Precip factor	Height %	Weight %	BMI %	Lowest BG	U ketones	CO2	cortisol	insulin	GH	Gen consult	AAs & OAs?	Days inpt	Endo outpt f/u	Fasting study?	Other Dx?	More CNMC visits for lowBG?	Other information
2009-04-28		1	3.9	1	1	1	x	2	92	80	50	42	1	17	17	<2	4.7	2	1	0	1	2	2	1	CNMC ER visit 9/09 age 4.4 for BG 30 at OSH 4+ ketones
		2	4.2	1	2	1	1	4	78	45	10	42	1	23	7	x	x	2	2	1	2	2	2	2	Following HG and IV glucose BG rose to 300 w/ concern for DM
2010-03-22		2	3.5	2	2	1	x	1	-4	-2.5		20	1	x	x	x		2	2	x	2	1	2	1	Congenital MD; additional HG admissions 2/11 and 8/12
2012-07-25		2	5.5	2	2	1	1	3	16	16	40	37	x	16	21.8			2	2	1	2	1	2	1	global devel delay/encephaolopathy; another episode 2013 and CNMC admission 7/14 for HG with fasting study
2008-11-29		1	4.1	2	2	1	2	3	28	41	49	51	1	22	13	4.4	x	2	1	1	2	2	2	2	Pt had brain CT, AA OA was performed by Neurology at a separate time.
4/26/07 IP 5/20/08 OP		1	5	1	2	1	1	4	75	75		32	1	23	9	<2	9	2	1	3	1	2	2	1	Home BG testing done, 3 f/u endo visits, OGTT to r/o diabetes, ER visit 8/08 age 6.3 for BG 45
2007-09-19		1	1.8	2	2	1	1	2	83	50		37	x	18	x	x	x	2	2	x	2	2	1	2	Dx type 1 DM 12/10 age 5.1, still followed at CNMC
2008-01-28	Vaidyanathan	3	4	2	2	1	1	4	76	70		38	1	x	27.9	x	x	2	2	2	2	1	2	2	Hosp INOVA 11/07; had fasting study during hosp x 12 hrs with BG 38 and + ketones
2009-11-02	Parker	2	2.1	2	2	1	1	4	2	-3.5		23	1	19	25	<2	x	1	1	2	2	2	2	1	ER visit for low BG 12/09 age 2.3
2008-06-10	Kaplowitz	2	3	1	2	1	1	2	88	83	50	40	x	19	x	x	x	1	1	1	2	2	2	1	admitted for likely low BG 8/09 age 4.2; seen by genetics 9/09 who did w/u inc AA/OA
2010-04-21	Austin	2	2.6	1	2	1	2	2	-3	-4	2	17	x	22	x	x	x	2	2	1	2	2	2	2	has chondrodysplasia punctata with poor p.o. intake
2010-06-15	Kaplowitz	3	3	2	2	1	1	2	92	63	16	23	1	x	39.8	<2	11.5	2	2	3	2	2	2	2	Low BG found during ER visit for wheezing but had Sx; hosp at HUH 1 mom prior to CNMC visit
2013-04-14	Kaplowitz	2	4.5	1	1	1	2	2	90	78	80	46		20	13.2	2.5	x	2	2	4	2	2	2	1	Pt w/dilated cardiomyopathy; labs 1 day after episode; further ER visit for likely low BG w/ketones age 5.4
2010-04-04	Kaplowitz	1	1.8	1	2	1	1	2	x	x	x	44	1	16	x	x	x	2	2	0	2	2	2	2	Not admitted
2012-01-27	Vaidyanathan	1	2	2	2	1	1	4	22	23	x	41	1	x	x	x	x	2	2	0	2	2	2	2	Mom stopped breast feeding hs shortly boefore episode; had testing for GSD by genetics ? Found VUS
2012-04-21	Arcara	2	5.2	1	2	1	1	1	39	28	28	54	1	23	17.4	x	x	1	1	2	2	2	2	2	Multiple episodes since age 15 mo; Seen by Genetics inpt and outpt with extensive w/u incl WES but no Dx made
2016-01-11	Kenigsberg	3	5.4	1	2	1	x	exercise?	70	50	39	44	1	20	20.7	<2	1.1	2	1	1 for fasting	1	1	2	2	Results from fasting study 3/28/16 w/ + ketones and BOHB 26; used CGM x 6 months w/no further episodes but cocerns for occ hyperglycemia. Seen by AD 2/14/19 no recurrence of low BG and mildly high ones non-fasting
2013-09-04	Arcara	2	2.7	1	2	1	1	4	36	17	15	39	1	17	12.1	<2	x	2	1	2	1	2	2	1	2nd episode 8/18/14 age 3.7; ED only; cortisol and insulin done then
2011-01-24	Kaplowitz	2	1.7	1	1	1	1	2	85	20		14	1	14	x	x	x	1	1	2	2	2	2	2
2011-09-07	Kaplowitz	3	6.2	1	2	1	x	2	52	54	50	30	1	x	normal	normal	normal	1	1	x	2	1	1	2	Followed by Genetics for recurrent HG since age 1; DNA showed VUS but c/w GSD type 9; endo r/o; still sees CNMC Genetics last visit 1/19 uses cornstarch hs and BG monitoring
2012-11-09	Lin	2	1.4	1	2	1	1	2	83	15		37	1	16	14.1	<2	7.6	1	1	3	2	2	2	2	Episode occurred after long flight from India with little po intake x 28 hrs
2014-03-10	Arcara	2	2.8	1	2	1	1	2	0.02	0.1		14	1	17	19.2	x	x	1	1	3	1	2	2	2	Has Smith-Magenis syndrome likely the cause of his poor growth
2017-03-27	Kaplowitz	2	4.7	2	2	1	1	1	30	18	21	32	1	13	x	x	x	2	1	2	1	2	2	2	4 days poor intake prior to episode
2017-03-06	Magge	2	1.4	1	1	2	1	2	7	6	86	45	1	18	20	<2	3	1	1	2	1	1	2	2	Labs done during fasting study on initial adm - when BG dropped to 50 BOHB was 35; RSS suspected based on PE findings but genetic testing negative
2016-12-20	Kaplowitz	2	2.9	2	1	2	1	4	39	40	44	48	1	22	x	x	x	2	2	1	2	2	2	2
2016-11-14	Kaplowitz	2	2.2	2	1	2	1	2	37	45	74	49	1	12	x	x	x	1	1	2	2	2	2	2	1/9/17 for lethargy/BG not low
2016-11-03	Vaidyanathan	3	2.5	2	2	2	1	4	67	40	20	24	1	x	x	x		2	2	2	1	1	2	2	Initial w/u for HG at SGAH 8/15 Dr Ning incl 14 hr fast; 2nd milder episode 8/16 OP only; saw PV for 2nd opinion
2016-06-20	Kaplowitz	2	3.5	1	2	2	1	2	23	16	19	38	1	15	x	x	x	1	1	2	2	2	2	2
2015-07-18	Vaidyanathan/LaRue	2	5	2	3	2	1	1	-6	-3	97	31	1	16	14	<2	0.9	1	1	8	1	2	2	1	She has OI with hx of multiple GI complications, all 3 episodes of hypoglycemia occurred while having a peroid of prolonged NPO due to severe constipation
2014-05-03	Vaidyanathan	2	2.3	1	1	2	1	4	48	63	81	23	1	17	40.3	x	x	2	2	4	1	1	2	1	multiple episodes of hypoglycemia, full endo and genetics workup including WES, all negative. Often had no precipitating factors.
2013-09-08	Arcara	2	1.8	1	2	2	1	2	93	95	90	52	x	21	x	<2	0.5	1	1	2	2	2	2	2
2017-06-09	Larue/V	2	4.8	2	2	2	1	1	14	43	7.5	52	1	10	23	<2	x	1	1	4	2	2	2	2	patient with autism, had GI bug and did not eat for >72 hours. Was severely dehydrated.
2014-10-23	Magge	2	1.3	2	2	2	3	1	27	18	30	37	1	15	14.6	<2	x	1	1	4	1	1	2	1	Peak GH after stim 5.1 had fasting study at CHOP 2015 non-diagnostic. Later treated for possible GH Def but continued to have hypoglycemia despite normal IGF-1 levels. Normal growth after GH discontinued. Also treated with cornstarch until 4years old. Last episode hyppoglycemia 2015 age 3
2015-04-02	LaRue/Salemi	2	2.8	1	2	2	1	1	94	95	99	41	2	19	1.6	-	x	1	1	2	2	2	2	2
2015-09-06	Kenigsberg	2	0.8	1	2	2	x	1	13	38	68	47	1	13	11.6	<2	3.8	1	1	4	1	1	1	2	NOT CONFIRMED.Likely glutaric acidemia per genetics, though UOA/PAA and microarray testing reported as normal. Developmental delay. Last seen by genetics 9/18 no HG but admitted for vomiting and ketones 1/17.
2016-06-12	Estrada	2	3.9	1	2	2	1	1	8	8	26	33	1	33	-	-	-	2	2	3	2	2	2	2	PMH: Trisomy 21. Several days of poor PO and URI sx
2015-05-07	Magge	2	1.3	2	2	2	1	1	32	21	38	50	2	16	35.2	3.2	5.5	2	1	2	1	1	2	2	Actual episode 5/17/15 but endo not consulted; tolerated 12 hr fast
2017-03-30	Kaplowitz	2	1.9	2	2	2	1	1				41	1	11	10.3	<2	x	1	1	2	2	2	2	2	4days poor intake and vomiting;BOHB 39
2016-01-19	LaRue/Kenigsberg	2	4.6	2	2	2	1	4	9	10	34	41	1	17	16	<2	2.4	1	1	1	1	1	2	2	BG started age 2, last hosp age 4.5; labs done during fasting study age 5 all c/w KH; no further HG
2017-05-31	Estrada	2	1.3	1	2	2	2	3	75	50	40	40	x	19	11.8	<2	3.2	2	2	2	2	1	2	2	Slept late 14 h; labs done after 12 hr fast with lowest BG 59 but blood ketones rising
2014-07-18	Boyce	2	1.5	2	2	2	x	2	9	2	10	45	1	x	18	<2		1	1	2	2	2	2	1	OSH before CNMC after vomiting and BG in 40s; ER visit 8/11/15 age 2.8 for low BG lethargy again associ with vomiting
2016-04-18	LaRue/Vaidyanathan	2	1.9	2	2	2	2	1	1	1	-1.2	22		15	x	x	x	2	2	1	2	2	2	2	Also asthma attack may have caused poor eating
2013-10-07	Vaidyanathan	2	3.1	2	1	2	1	4	52	9.8	<3	18	1	16	17.3	x	x	1	1	3	2	2	2	2	Cortisol drawn 2 days after presentation
2014-04-22	Kaplowitz	1	3.6	2	3	2	1	2	34	11	7	42	1	15	21.1	<2	x	1	1	2	1	2	2	1	Cortisol, and insulin were drawn during the another episode of vomiting- but no recorded HG at the time of critical sampling. Further 5 other ED visits at 3y9m, 3y10m, 3y11m, 3y12m and 4y7m.
2012-07-06	Mehra	3	0.8	2	2	2	1	1	49	73	86	26	1	x	x	x	x	2	2	0	2	2	2	2
2017-05-11	Magge	3	4.1	1	2	2	1	1	0.2	2.9	68	38	1	x	28.4	<1	2.9	2	2	2	1	1	2	2	Hx of Trisomy 21 and hypothyroidism. KH happened in the context of 5 days of fever, diarrhea, decreased PO. In outside hospital, 18 hour fastinf performed, he dropped to 45 at 15 hours, critical samples sent at that time (which was 2 days after the initial low BG). Still followed for thyroid last visit 9/18 - no further episodes HG
2015-01-27	Dixon	3	1.8	1	3	2	x	1	0	5	x	38	1	15.6	1.6	x	x	1	1	4	1	2	2	2	ex 33 weeker, with a history of ventriculomegaly, cerebral palsy, hypotonia, asthma, GERD, and developmental delays. Genetic consult: increasedbC2 (acetylcarnitine) and C4OH (likely 3hydroxybutyrylcarnitine). These findings likely secondary to ketosis. 2/16 phone call another episode low BG treated at home; 11/17 phone call - mom wanted more strips for testing if sick but NO FURTHER BGs <60 found
2013-06-04	Nandagopal	2	0.6	2	1	2	1	4	54	41	x	29	2	22	10.6	<2	2.3	1	1	4	2	2	2	1	Hx of seizure disorder, on Keppra. Ketones neg but 12 hrs after arrival. Critical sample drawn 24 h after presentation while BG was 66. Genetic consult: suspected for glycogen storage disease however gene testing showed no mutation.
2016-01-06	Kenigsberg	2	2.6	2	2	2	x	2	96	18	0	44	1	16	13.7	<2	2.1	2	2	4	1	1	2	2	Passed 12 hours fasting.
2013-10-11	Arcara	3	2.5	1	1	2	1	4	54	54	42	46	x	x	x	x	x	2	2	0	2	2	2	2	history of gastroesophageal reflux, asthma
2016-02-14	Kenigsberg	2	2.8	2	1	2	1	1	18	29	55	31	1	20	x	x	x	1	1	2	1	2	2	2	hospitalized 4 times for low blood sugars (blood sugars at those times were: 67, 47, 31, 90s but not tolerating PO. Genetic consult: no concerns for metabolic disorder. Had metab w/u at CHOP including WES; + FH of proprionic acidemia but testing _
2017-03-23	Shimy	1	4	2	3	2	1	1	0.6	0	0.1	32	1	20	x	x	x	2	2	10	1	2	2	1	Cortisol:11.4 (performed 8 months after diagnosis). Admitted for 10 days due to chronic FTT. No further ED visist for HG, but reported home HG with ketones on outpatient follow up visit. Dx with RSS by genetics 11/18; last seen by endo 1/19
2016-11-23	Shimy	2	3.3	1	2	2	1	4	53	89	95	45	x	x	7.8	<2	0.9	2	2	2	1	2	2	1	Critical sampling within the 24 hours of presentation.
2015-01-28	Dixon	3	2.1	2	2	2	1	1	77	66	49	48	1	16	x	4.3	x	2	2	2	1	1	2	1	Second episode in 1 month with negative ketone. Multiple other episodes later. Eventually had admission for workup, passed 23 hour fasting challenge and BOHB:33.5, FFA 3.26, Cortisol 14.3, insulin <2.
2017-03-03	Kenigsberg	2	3	1	3	2	2	2	75	85	78	30	x	x	36.9	x	x	1	2	2	2	2	2	1	He has h/o food refusal requiring NG tube due to previous hypoglycemia episodes. He had genetic evaluation with OA, AA evaluation which was normal. This episode happened right after NG feed discontinued and he refused food for 18 hours. No HG mentioned in last GI visit 12/18 but getting tube feeds
2014-03-06	Vaidyanathan	2	3.8	1	2	2	2	2	21	25	x	37	1	18	10.7	x	x	2	1	2	1	1	2	2	He passed fasting test for 14 hours.
2016-04-27	Kenigsberg	3	2.4	2	2	2	1	4	51	79	86	58	1	x	x	x	x	2	2	0	2	2	2	2	She only had 1 outpatient visit at CNMC.
2014-04-18	Boyce	2	1.8	1	2	2	x	1	60	17	x	40	x	17	x	x	x	1	1	1	2	2	2	2
2014-05-12	Mehra	2	1.3	1	2	2	1	4	45	22	x	49	1	17	x	x	x	1	1	2	2	2	2	2
2014-05-26	Lin	2	2.3	1	1	2	1	4	48	24	x	32	1	x	4.9	x	x	1	1	2	2	2	2	2
2013-06-17	Vaidyanathan	2	2.4	2	2	2	1	1	41	3	-3	37	1	8	12.4	x		1	1	4	1	1	1	1	Initial visit 6/13 had Na 126, CO2 8, BUN 39; cortisol and GH done >1 day later; ketones took 2 days to clear; 2nd episode similar 6/14; 3rd episode 10/14 - after went to CHOP for fasting study c/w KH; 5/15 episode Rx at home; 10/15 note CHOP fond MCT-1 mutation; Rx cornstarch 2 Tb hs; no more episodes past 10/15 but parents check BG/ketones when sick; wt gain coninues poor last endo visit 2/19
2017-01-03	Shimy	2	2.5	2	2	2	1	2	-3.2	-3.5	6	40	x	16	x	<2	x	1	1	5		1			Based on Ht SD -3.2, had IGF-1 and BP3 done during admission and both very low; MRI showed pit hypoplasia, no stalk and ectopic posterior pituitary confrming Dx of GHD. Nl Cortisol and FT4 not at time of episode. No uine ketones checked but OHD after overnight fast high at 27 mg/dl.
	SUMMARY	8		31	12	23	43	19					45					28	35		23	17	3	18
		41		29	43	37	7	20					3					32	25		37	43	57	42
		11			5			3
								17
	PERCENTAGE	13.3333		51.6667	20	38.3333	86	32.2034					93.75					46.6667	58.3333		38.3333	28.3333	5	30
		68.3333		48.3333	71.6667	61.6667	14	33.8983					6.25					53.3333	41.6667		61.6667	71.6667	95	70
		18.3333			8.33333			5.08475
								28.8136
2016-08-01	Kaplowitz	2	1.6	M	1	1	1	2	3	42	92	13	1	-	51	-	-	2	2	2	2	2	2	2	On propranolol for SVT but no recent change in dose
2013-09-11	Kaplowitz	1	1.9	M	2	2	x	2	14	0	x	21	x	26	18.4	x	x	2	2	2	2	2	2	2	H/o SVT, on proporanalol since 16 m/o, HG happened during illness with fever and decreased PO, but Propranalolo dose was also increased 1 week prior to that?
2014-04-02	Kaplowitz	3	1.3	M	2	2	1	2	0	2	x	23	2	x	9.6	x	x	2	1	3	2	2	2	2	h/o long QT syndrome, on Propranolol 10mg TID, increased from 8mg BID 3 weeks ago.
2013-05-20	Lin	2	0.8	F	1	2	1	2	89	50	x	17	1	20	18.9	x	x	2	2	2	2	2	2	2	h/o congenital cataract and hemangioma with Propranalol 5.6mg TID, increased from 4.8mg 1 week ago. Cortisol drawn 1 day after presentation.

## Sheet: f-u data
Date of consult	Age decimal	Good expl	Prevent and Rx	Prev episodes	More episodes	Any Rx at home	Total #	Date last y/m	Age at last	Other info
2009-04-28	3.9	N	Y	Y	Y	N- ER visit	4		0.8	Had low BG Sz DOL 1
	4.2								0.8
2010-03-22	3.5	Y	Y	Y	Y	N	4	2019-08-12	1.3	Congenital MD; uses G Tube overnight since 2013
2012-07-25	5.5	Y	Y	Y	Y	Y	5	2019-11-14	1.4
2008-11-29	4.1								1.5
4/26/07 IP 5/20/08 OP	5	N	Y	N	Y	Y	3		1.8	Had Sz w/u at Hopkins - not clear if Sz due to HG
2007-09-19	1.8	N	Y	N	N		1	2019-09-07	1.8	Developed type 1 at age 5.1
2008-01-28	4								1.8
2009-11-02	2.1	N	?	Y	Y	Y	5	2013	2
2008-06-10	3	Y	Y	N	Y	Y	3	2019-12-09	2.3
2010-04-21	2.6	N	N	N	Y	N	4	2012	2.3
2010-06-15	3	Y	Y	N	N		1	2019-06-10	2.9
2013-04-14	4.5	Y	Y	N	Y	N	2	2019-02-13	2.9
2010-04-04	1.8	Y	Y	N	N		1	2019-04-10	3
2012-01-27	2	N	Y	Y	N		2	2019-01-12	3.1	Urine + AAs DNA testing for GSD found VUS
2012-04-21	5.2	Y	Y	Y	N		4	2019-04-12	3.1	Full genetics incl WES f/u w/ FFx genetics Alpan
2016-01-11	5.4		x	x	N				3.2	Episodes of both somewhat low and somewhat high BGs but fasting study c/w KH
2013-09-04	2.7	Y	Y	N	Y	N- ER visit	2	2019-08-14	3.7
2011-01-24	1.7								3.8
2011-09-07	6.2						10		4	Genetics Dx with GSD type 9
2012-11-09	1.4								4
2014-03-10	2.8								4
2017-03-27	4.7		Y	N	Y	Y	3	2019-05-17	4
2017-03-06	1.4	N	Y	N	N		1	2019-03-17	4.5
2016-12-20	2.9	N	Y	Y	N			2019-12-16	4.7
2016-11-14	2.2	Y	Y	N	Y	N - ER visit	2	2019-01-17	4.8
2016-11-03	2.5	Y	Y	Y	N		2	2019-08-16	4.8
2016-06-20	3.5								5
Date of consult	Age decimal	Good expl	Prevent and Rx	Prev episodes	More episodes	Any Rx at home	Total #	Date last y/m	5.1	Other info
2015-07-18	5								5.2
2014-05-03	2.3	Y	Y	Y	Y		10	2019-02-18	5.4	Full genetics w/u including WES
2013-09-08	1.8	Y	Y	N	N		1	2019-09-13	5.7
2017-06-09	4.8	Y	Y	N	N		1	2019-06-17	5.7
2014-10-23	1.3			N			10		5.9	Thought to have GHD but HG persisted despite GH Rx
2015-04-02	2.8								6
2015-09-06	0.8			N	N		1		6	Had gluatric acid in urine but genetic testing neg for glutaric aciduria though being treated as such as a precaution
2016-06-12	4	N	N	Y	N		2	2019-06-16	6.3
2015-05-07	1.3		Y	Y	N		1	2019-05-15	6.8
2017-03-30	1.9								7.5
2016-01-19	4.6	Y	Y	Y	Y	Y	10	19	7.8	No futher hosp visits but continues at age 7 to have milder episodes treated at home
2017-05-31	1.3								Age at last
2014-07-18	1.5								x
2016-04-18	1.9
2013-10-07	3.1	N	N	N	N		1	2019-10-13
2014-04-22	3.6	Y	Y	Y	Y	N	5	2019-09-15
2012-07-06	0.8
2017-05-11	4.1	x	x	N			1	2019-04-17		Still seen for DS and thyroid - no further episdes mentioned in chart
2015-01-27	1.8		x	x			2	2019-02-16
2013-06-04	0.6	Y	Y	N	Y	N	2	2019-08-13		Genetic testing for GSD negative
2016-01-06	2.6	Y	Y	N	Y	Y	4	2019-01-19
2013-10-11	2.5
2016-02-14	2.8		N	N	Y	N	4	2019-12-18		Uncle and aunt had propionic acidemia but WES testing at CHOP and PA testing all -
2017-03-23	4
2016-11-23	3.3	N	Y	N	Y	Y	3	2017
2015-01-28	2.1	N	N	Y	Y	Y	5			Several episodes of post-feed hyperglycemia but no diabetes
2017-03-03	3		x	Y	N		2	2019-03-17		No further episdesbut getting tube feeds per GI for food refusal
2014-03-06	3.8	Y	Y	N	N		1	2019-03-14
2016-04-27	2.4	Y	Y	N	Y	Y	4	2019-07-18
2014-04-18	1.8	N	N	Y	Y	Y	5
2014-05-12	1.3	N	Y	Y	N		2	2019-05-14
2014-05-26	2.3
2013-06-17	2.4		Y	N	Y	Y	4	2019-05-15	4.3	Presented with severe acidosis CO2 8 and prolonged clearance of ketones; later Dx CHOP MCT-1 mutation; Rx cornstarch hs by genetics
